# Supplementary material for: Cumulative Joint Burden of Functional Limitation and Depressive Symptoms on Cardiovascular Disease Risk ：A Nationwide Bidirectional Mediation and Competing Risks Analysis
Source: Research Square preprint supplement (doi:10.21203/rs.3.rs-7509404/v1), 2025-10-17
Supplement: Supplementary file 1 [file 30bc4bfec4520639d917504c.docx]

**Method**

- **Method 1. Calculation of Time-weighted Cumulative Average Scores (with R Code)**
- **Method 2. Covariate Definitions: Education Level Classification**
- **Method 3. Statistical Analysis: Handling of Non-convergence in Bootstrap Simulations for Mediation Analysis**

**Tables**

- **Table 1. Interaction Between Cumulative Average Functional Limitation and Depressive Symptoms in Relation to Incident Cardiovascular Disease: Results from a Competing Risks Regression Model**
- **Table 2. Bidirectional Causal Mediation Analysis of Functional Limitation and Depressive Symptoms on Time to Cardiovascular Disease**
- **Table 3. Sensitivity Analyses for the Association Between Joint Health Status and Incident Cardiovascular Disease**

**Panel A:** **Model specification (Standard cause-specific Cox model)**

**Panel B: Exposure definition (Stricter depressive symptom cut-point, CES-D ≥ 12)**

**Panel C: Exposure timing (Baseline vs. cumulative health status),**

**Table 4. E-value Analysis for Potential Unmeasured Confounding**

- **Figure1 Joint Effect of Functional Limitation and Depressive Symptoms on incident CVD: A Subgroup Analysis**

**Method 1. Calculation of Time-weighted Cumulative Average Scores (with R Code)**

To quantify the long‐term burden of functional limitation (FL), we calculated a time‐weighted cumulative average FL score for each participant.

This metric was computed as the area under the curve (AUC) of their FL scores, divided by their total individual follow‐up time in years.

The AUC was estimated using the trapezoidal rule, integrating the scores between consecutive study waves, beginning from each participant’s unique entry wave until their time of CVD incidence, death, or censoring.

For participants whose follow-up concluded between assessment waves, the FL score at the end of their follow-up was linearly interpolated.

For participants with only a single valid FL measurement throughout follow-up, the cumulative average was defined as that single score.

This method provides an individualized measure of average functional burden over the observation period.

**R Implementation**

# Function: calculate_cumulative_exposure_auc

# Purpose: Calculate time-weighted cumulative average of a longitudinal score

# Inputs:

# scores Numeric vector of score measurements across waves

# times Numeric vector of times (in years from baseline) for each score

# entry_wv Integer, entry wave number (1–4)

# followup_time_y Numeric, total follow-up duration in years

# Output:

# Numeric scalar, cumulative average score over follow-up (or NA)

calculate_cumulative_exposure_auc <- function(scores, times, entry_wv, followup_time_y) {

if (is.na(followup_time_y) || followup_time_y <= 0) return(NA_real_)

# Subset from the entry wave onwards

valid_indices <- entry_wv:length(scores)

if (length(valid_indices) == 0) return(NA_real_)

valid_scores <- scores[valid_indices]

valid_times <- times[valid_indices] - times[valid_indices][1] # set entry as t=0

complete_obs <- !is.na(valid_scores) & !is.na(valid_times)

# Only one valid observation → return that score

if (sum(complete_obs) < 2) {

return(mean(valid_scores[complete_obs], na.rm = TRUE))

}

valid_scores <- valid_scores[complete_obs]

valid_times <- valid_times[complete_obs]

auc <- 0

for (i in 1:(length(valid_times) - 1)) {

if (followup_time_y > valid_times[i]) {

segment_start_time <- valid_times[i]

segment_end_time <- min(followup_time_y, valid_times[i+1])

time_diff_segment <- valid_times[i+1] - valid_times[i]

# Interpolation if event/censoring in the interval

if (segment_end_time < valid_times[i+1]) {

interp_fraction <- (segment_end_time - segment_start_time) / time_diff_segment

score_end <- valid_scores[i] +

interp_fraction * (valid_scores[i+1] - valid_scores[i])

} else {

score_end <- valid_scores[i+1]

}

auc <- auc + (valid_scores[i] + score_end) / 2 * (segment_end_time -segment_start_time)

}

}

return(auc / followup_time_y)

}

**Method 2. Covariate Definitions: Education Level Classification**

Education level in CHARLS was categorized into three groups:

**•** **Less than lower secondary education** – no formal schooling, did not finish primary school but could read, sishu (private tutoring), elementary school, or middle school;

**•** **Upper secondary and vocational training** – completed high school or vocational school;

**•** **Tertiary education** – two-/three-year college, college graduate, or postgraduate degree.

Special response codes in CHARLS (e.g., disputed records, “don’t know,” refused) were set to missing for analysis consistency.

**Method 3. Statistical Analysis: Handling of Non-convergence in Bootstrap Simulations for Mediation Analysis**

The bidirectional causal mediation analyses were conducted using the mediate package (version 4.5.0) in R (version 4.3.1) with 1000 bootstrap resamples for generating percentile-based confidence intervals. The outcome model specified was an accelerated failure time (AFT) model with a Weibull distribution, fit using the survreg function from the survival package. The AFT model control settings were adjusted (survreg.control(maxiter = 100)) to increase the maximum iterations and improve convergence stability.

During the bootstrap procedure for the two primary pathways (FL → CES-D → CVD and CES-D → FL → CVD), we observed 15 and 17 instances, respectively, where the survreg function issued a warning for failing to converge within the specified 100 iterations. This corresponds to a non-convergence rate of 1.5% and 1.7%. Given that the rate was minimal (<2%) and distributed across the resamples, this was deemed unlikely to introduce meaningful bias to the final point estimates or the stability of the bootstrap-derived confidence intervals. The reported results are based on all successfully converged simulations.

**Table 1.** **Interaction Between Cumulative Average Functional Limitation and Depressive Symptoms in Relation to Incident Cardiovascular Disease: Results from a Competing Risks Regression Model** (N = 12,274)

| **Variable** | **SHR** | **95% CI** | **p-value** |
| --- | --- | --- | --- |
| **Main Exposures** |  |  |  |
| **Cumulative CES-D (per 1-point increase)** | 1.047 | 1.038–1.056 | <0.001 |
| **Cumulative average FL (per 1-point increase)** | 1.144 | 1.116–1.173 | <0.001 |
| **Cumulative average CES-D × Cumulative average FL** | 0.990 | 0.987–0.993 | <0.001 |
| **Covariates** |  |  |  |
| **Age 55–64 (ref: 45–54)** | 1.292 | 1.169–1.427 | <0.001 |
| **Age 65–74** | 1.496 | 1.328–1.685 | <0.001 |
| **Age ≥75** | 1.158 | 0.954–1.406 | 0.141 |
| **Gender (ref: Male)** |  |  |  |
| **Female** | 1.151 | 1.023–1.296 | 0.020 |
| **Education (ref: Less than secondary)** |  |  |  |
| **Secondary & vocational** | 1.231 | 1.066–1.421 | 0.005 |
| **Tertiary** | 1.368 | 1.005–1.862 | 0.046 |
| **Residence (ref: Urban)** |  |  |  |
| **Rural residence** | 0.716 | 0.645–0.795 | <0.001 |
| **Marital status (ref: Partnered)** |  |  |  |
| **Unpartnered (ref: Partnered)** | 0.920 | 0.699–1.210 | 0.550 |
| **Living alone (ref: No)** |  |  |  |
| **YES** | 1.120 | 0.871–1.440 | 0.380 |
| **Child contact (ref: Regular contact)** |  |  |  |
| **No contact** | 0.857 | 0.737–0.996 | 0.045 |
| **No children** | 0.987 | 0.744–1.309 | 0.930 |
| **Social activity participation (ref: Yes)** |  |  |  |
| **No** | 0.930 | 0.857–1.008 | 0.077 |
| **Smoking status (ref: Never)** |  |  |  |
| **Former** | 1.254 | 1.067–1.473 | 0.006 |
| **Current** | 1.082 | 0.956–1.224 | 0.209 |
| **Drinking status (ref: Never/Former)** |  |  |  |
| **Current** | 0.940 | 0.852–1.037 | 0.209 |
| **Hypertension (ref: No)** |  |  |  |
| **Yes** | 1.854 | 1.701–2.021 | <0.001 |
| **Diabetes (ref: No)** |  |  |  |
| **Yes** | 1.202 | 1.032–1.399 | 0.018 |

*Abbreviations: S*HR = subdistribution hazard ratio; CI = confidence interval; CES-D = 10-item Center for Epidemiologic Studies Depression Scale; FL = functional limitation.

*Notes.* Results were derived from a competing risks regression model treating death as a competing event. The pseudo-likelihood ratio test was 672 on 20 degrees of freedom.

**Table 2. Bidirectional Causal Mediation Analysis of Functional Limitation and Depressive Symptoms in Relation to Time to Cardiovascular Disease**

**（AFT Model），N = 12,274**

| **Effect type** | **Estimate** | **95% CI lower** | **95% CI upper** | **% Mediated** |
| --- | --- | --- | --- | --- |
| **Pathway 1: FL → DS → CVD** |  |  |  |  |
| **ACME (average)** | –0.171 | –0.215 | –0.130 | 28.2% |
| **ADE (average)** | –0.436 | –0.529 | –0.330 | — |
| **Total effect** | –0.607 | –0.700 | –0.510 | — |
| **Pathway 2: DS → FL → CVD** |  |  |  |  |
| **ACME (average)** | –0.0497 | –0.0613 | –0.0400 | 23.6% |
| **ADE (average)** | –0.1607 | –0.2018 | –0.1200 | — |
| **Total effect** | –0.2104 | –0.2520 | –0.1700 | — |

*Notes.* FL = functional limitation; DS = depressive symptoms; CVD = cardiovascular disease; ACME = average causal mediation effect; ADE = average direct effect. Estimates are in log-time units from accelerated failure time models, where a negative value indicates a shorter time to CVD onset. Proportion mediated = ACME ÷ Total effect. All results derived from nonparametric bootstrap with 1,000 resamples (two-sided).

**Table 3. Sensitivity Analyses for the Association Between Joint Health Status and Incident Cardiovascular Disease, CHARLS, N = 12,274**

| **Sensitivity analysis & health status group** | **Effect estimate (95% CI)** | **p** |
| --- | --- | --- |
| **Panel A:** **Model specification (Standard cause-specific Cox model), HR (95% CI)** |  |  |
| **Neither condition (Reference)** | 1.00 (Reference) | — |
| **Functional limitation only** | 1.63 (1.43–1.87) | <0.001 |
| **Depressive symptoms only** | 1.39 (1.21–1.61) | <0.001 |
| **Both conditions** | 2.21 (1.97–2.48) | <0.001 |
| **Panel B: Exposure definition (Stricter depressive symptom cut-point, CES-D ≥ 12), SHR (95% CI)** |  |  |
| **Neither condition (Reference)** | 1.00 (Reference) | — |
| **Functional limitation only** | 1.26 (1.12–1.41) | <0.001 |
| **Depressive symptoms only** | 1.33 (1.18–1.49) | <0.001 |
| **Both conditions** | 1.48 (1.31–1.66) | <0.001 |
| **Panel C: Exposure timing (Baseline vs. cumulative health status), SHR (95% CI)** |  |  |
| **Neither condition (Reference)** | 1.00 (Reference) | — |
| **Functional limitation only** | 1.24 (1.09–1.41) | 0.001 |
| **Depressive symptoms only** | 1.35 (1.22–1.50) | <0.001 |
| **Both conditions** | 1.54 (1.37–1.72) | <0.001 |

*Notes.* CES-D = 10-item Center for Epidemiologic Studies Depression Scale; CI = confidence interval; HR = hazard ratio; SHR = subdistribution hazard ratio. All models were fully adjusted for the covariates listed in Table 1.

**Table 4. E-value analysis for potential unmeasured confounding, CHARLS, N = 12,274**

| **Exposure contrast** | **SHR (95% CI)** | **E-value (point estimate)** | **E-value (lower 95% CI)** |
| --- | --- | --- | --- |
| **Both conditions vs. neither (fully adjusted, Fine–Gray model)** | 2.14 (1.92–2.40) | 2.77 | 2.51 |

*Notes.* SHR = subdistribution hazard ratio; CI = confidence interval. The E-value represents the minimum strength of association, on the risk ratio scale, that an unmeasured confounder would need to have with both the exposure and the outcome, conditional on the measured covariates, to fully explain away the observed association.
